# Supplementary material for: Genomic targets, and histone acetylation and gene expression profiling of neural HDAC inhibition
Source: PubMed Central journal article supplement — Nucleic Acids Res. 2013 Jul 1;41(17):8072–84. doi: 10.1093/nar/gkt590 (PMC3783173; doi:10.1093/nar/gkt590), 2013-07-01
Supplement: supp_gkt590_nar-01050-m-2013-File009.pdf [file supp_gkt590_nar-01050-m-2013-File009.pdf]

## **Inventory of Supplementary material:**

### **I. Supplementary Figures S1-S9 and legends:**

**Supplementary Figure S1.** Summary of the different expression and ChIPseq experiments presented in this study.

**Supplementary Figure S2.** Testing of AcH2B antiserum.

**Supplementary Figure S3.** Reproducibility of ChIPseq experiments.

**Supplementary Figure S4.** Correlation and overlap between epigenetic marks.

**Supplementary Figure S5.** Correlation between epigenetic marks and gene expression levels.

**Supplementary Figure S6.** TSA hyperacetylation of bulk chromatin.

**Supplementary Figure S7.** TSA also targets intragenic sequences and putative regulatory regions.

**Supplementary Figure S8.** Correlation between the changes in histone acetylation and transcript levels induced by TSA.

**Supplementary Figure S9.** Interaction between TSA-induced hyperacetylation and novelty-driven gene expression.

### **II. Supplementary Tables S1-S3:**

**Supplementary Table S1.** ChIPseq library size, technology and other features.

**Supplementary Table S2.** Comparison of gene expression profiles in the hippocampus of TSA- and vehicle-treated animals.

**Supplementary Table S3.** Comparison of gene expression profiles in the hippocampus of wild-type and cbp<sup>+/-</sup> mice that were treated with TSA- or vehicle and subjected or not to novelty exposure.

### **III. Supplementary Methods (including Supplementary References)**

### **IV. Supplementary Datasets S1 and S2:**

**Supplemental Dataset S1.** Unbiased detection of H3K4m3, AcH3K9,14, AcH4K12 and AcH2B islands in hippocampal mouse chromatin (4 spreadsheets).

**Supplemental Dataset S2.** SICER comparison of acetylation profiles in hippocampal chromatin of TSA- and vehicle-treated animals (3 spreadsheets).

These datasets are accessible at the URL: <http://in.umh.es/IP/Barco-lab-dataSets.html>

**Legends for Supplemental Figures S1-S9:**

**Supplemental Figure S1. Summary of the different gene expression and ChIP experiments presented in this study.** Schema depicts a time line showing the times of TSA treatment, tissue collection and analytical procedures. Protein extracts from mouse hippocampus were used to assess histone modifications in bulk chromatin by western-blot at 15, 30, 75, 150 and 300 min after a single intraperitoneal TSA injection, and 30 and 150 min after vehicle administration. ChIPseq and ChIP assays were performed 30 min after TSA administration when histone hyperacetylation was at its peak. Whole-genome tiling arrays were used to profile gene expression 75 min after TSA or vehicle administration in wild-type and CBP heterozygous mice that were subjected or not to novelty exposure. TSA-triggered gene expression was measured by RT-qPCR at 75, 150 and 600 min after treatment, vehicle samples were taken 75 min after treatment.

**Supplemental Figure S2. Testing of AcH2B antiserum.** **A.** HEK293 cells were treated with TSA (2 $\mu$ M) or vehicle (Veh) for 2 h. Western blot analysis for AcH2B (AcH2B) was carried out in the presence of acetylated (Ac) or non-acetylated (Non Ac) peptide with the first 22 amino acids of mouse histone H2B. Peptide concentration was 2  $\mu$ g/ml.  $\beta$ -actin was used as a loading control. **B.** HEK293 cells and mouse hippocampus protein extracts were immunoprecipitated with AcH2B antiserum (IP). Then, immunoprecipitated proteins were analysed by western blot using the same antiserum (AcH2B). Mock condition (Mock), rabbit IgG IPs (Control IgG) and whole lysate (Whole lysate) were loaded as controls. **C.** ChIP analysis was performed in mouse hippocampal chromatin extracts with anti-AcH2B (AcH2B) or preimmune serum (Prei). ChIP-PCRs were performed using primer pairs against the *Gapdh*, *Arc* and *Fos* gene promoters. The neuronal gene *Tubb5* and the gene *HBb*-

*bhl1*, which is not expressed in mature neurons, were also analysed. PCR in the input condition (input) was performed using 1% of crude chromatin preparation.

**Supplemental Figure S3. Reproducibility of ChIPseq experiments.** **A.** Heatmap and hierarchical dendrogram depicting the cross-correlation matrix across the whole dataset for the entire set of samples. **B.** Two-dimensional Multi-Dimensional Scaling (MDS) of coverage profile across samples. **C.** A representative genomic view of ChIPseq data generated for H3K4me3, AcH3K9,14, AcH4K12, AcH2B and input are shown to illustrate reproducibility. **D.** Density heatmap showing the coverage across 10kb around Refseq TSSs. Individual sequences were binned in 50bp windows (200 bins per sequence) and coverage was computed and plotted as a relative color intensity scale.

**Supplemental Figure S4. Correlation and overlap between epigenetic marks.** **A.** Mean enrichment profiles presenting the genomic distribution of reads for AcH3K9,14, AcH4K12 and AcH2B across all annotated TSSs (left), the gene length (middle) or intergenic regions (right). The insets show a magnification of the scale in the Y-axis to better illustrate AcH4K12 and AcH2B profiles. **B.** Heatmap matrix of Pearson correlation indexes between the enrichment of different histone marks in the adult mouse hippocampus. The correlation was calculated for enrichment coverage values around the TSS (+/-1 kb) across all annotated TSS expressed as log2 enrichment over background level. **C.** Venn diagrams showing the overlap between the four types of islands. The values correspond to the number of islands that physically overlap (left) and to the number of genes containing islands (right).

**Supplemental Figure S5. Correlation between epigenetic marks and gene expression levels.** **A.** Heatmap showing signal density around all annotated TSSs (+/- 10 kb) were subjected to k-means clustering for grouping those TSSs that presented

similar read densities for the different histone modifications (H3K4me3, AcH3K9,14, AcH4K12 and AcH2B). Linear normalization was applied to the datasets to reduce the bias caused by inter-samples intensity differences. The nine clusters initially identified were pooled into three groups according to their similarity after visual exploration. **B.** Boxplot shows relative mRNA expression values for genes in each of the clusters defined in A. **C.** A view of the acetylation profile in a fragment of chromosome 1 that contains genes with different levels of expression in hippocampal tissue illustrates the correlation between gene expression levels and the presence of the AcH3K9,14 mark. Island coloring follows Figure 2 legend.

**Supplemental Figure S6. TSA hyperacetylation of bulk chromatin.** Densitometric quantification of western blot data (**A**) and representative western blot images (**B**) of hippocampal bulk histone acetylation levels in animals subjected to intraperitoneal injection of TSA or vehicle (Veh) 30 minutes after injection. \*  $P < 0.05$ , Student's t-test versus vehicle;  $n=3$  per group. Data are expressed as mean  $\pm$  s.e.m.

**Supplemental Figure S7. TSA also targets intragenic sequences and putative regulatory regions.** **A.** Mean enrichment pattern for AcH3K9,14 (red lines in upper panels), AcH4K12 (blue lines in middle panels) and AcH2B (green lines in bottom panels) were profiled across gene length (left) and intergenic regions (right) for vehicle- (dotted lines) and TSA-treated mice (solid lines). **B.** Mean enrichment pattern for AcH3K9,14 (red lines in upper panels), AcH4K12 (blue lines in middle panels) and AcH2B (green lines in bottom panels) were profiled across putative CBP (left) and p300 (right) enhancers in chromatin of vehicle- (dotted lines) and TSA-treated (solid lines) mice. Solid grey line in AcH3K9,14 and AcH4K12 ChIPseq experiments shows coverage in input condition. **C.** Mean enrichment pattern for AcH3K9,14 (red lines), AcH4K12 (blue lines) and AcH2B (green lines) in intergenic islands that are

not associated with annotated genes nor CBP/p300 putative enhancers in the chromatin of vehicle- (dotted lines) and TSA-treated (solid lines) mice. Solid grey shows the coverage in input condition. These 2987 islands were initially identified based on significant AcH3K9,14 enrichment but they were also enriched in AcH4K12 and AcH2B. **D.** Representative genomic view presenting some intergenic acetylation islands. These islands may label non annotated genes or indicate the existence of novel regulatory regions.

**Supplemental Figure S8. Correlation between the changes in histone acetylation and transcript levels induced by TSA.**

**A.** Pie chart showing annotation of top differentially enriched islands upon TSA administration relative to their location within the gene sequence. Most of the largest changes in AcH3 and AcH4 occurred at promoter regions (5' UTR), whereas, the largest changes in AcH2B levels occurred at internal positions (Intragenic). Very few of these large changes mapped into the 3' UTR (3' UTR). **B.** Scatter plots show differential expression values in genes that were on the top of differentially acetylated genes upon TSA treatment. Linear regression model is shown as a red line. Pearson correlation coefficients are also included (top of each chart). **C.** Scatter plots show differential acetylation values in the genes that were differentially expressed genes upon TSA treatment. Red points correspond to genes that were also present in the group of genes that showed the largest acetylation response upon TSA administration ( $FC > 2$ ,  $FDR\ p\text{-val.} < 10^{-10}$  in the comparison of TSA and vehicle samples). Most red points in the AcH3 and AcH4 graphs correspond to the same genes; among them we find *Rest*, *L3mbtl3*, *Sox11*, *Fam60*. Linear regression model is shown as a red line. Pearson correlation coefficients are also included (top of each chart).

**Supplemental Figure S9. Interaction between TSA-induced hyperacetylation and novelty-driven gene expression.** **A.** Box plot depicts enrichment levels for each histone mark in NE-induced genes. Enrichment levels for the population of islands found for each modification is also included as reference (All peaks). Percentages represent the number of genes showing enriched islands among NE-induced genes. **B.** Scatter plots show differential acetylation values as fold changes ( $\log_2$ ) and gene expression fold changes (mRNA,  $\log_2$ ) in the comparison of TSA and vehicle, in genes that were differentially expressed genes upon novelty. Linear regression model is shown as a red line. Pearson correlation coefficients are also included (top of each chart).

Lopez-Atalaya et al., Supplemental Figure S1

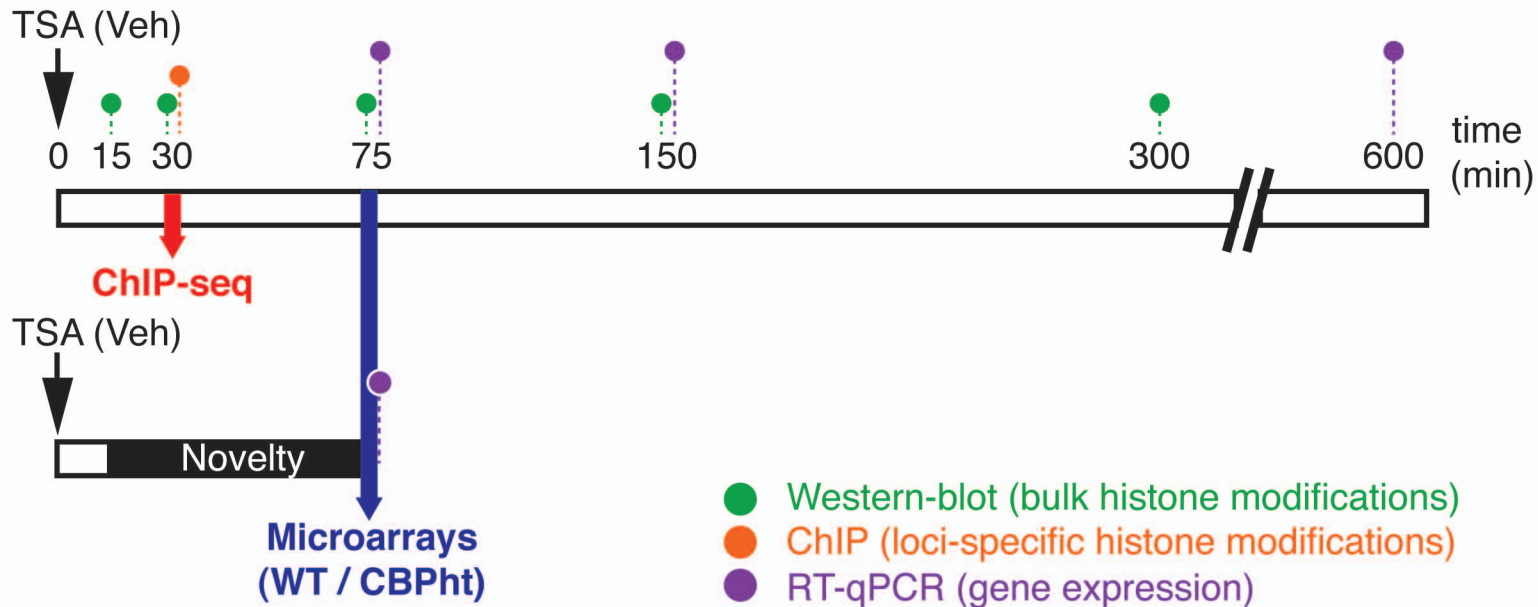

Lopez-Atalaya et al., Supplemental Figure S2

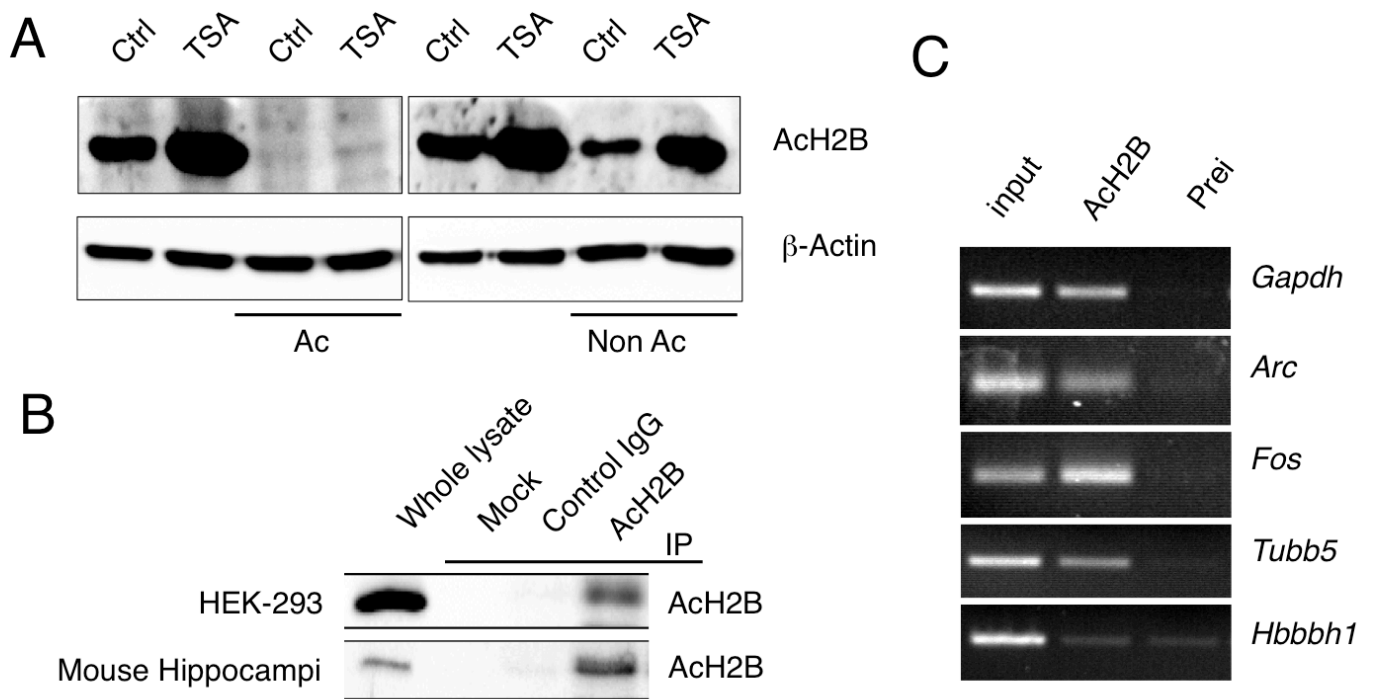



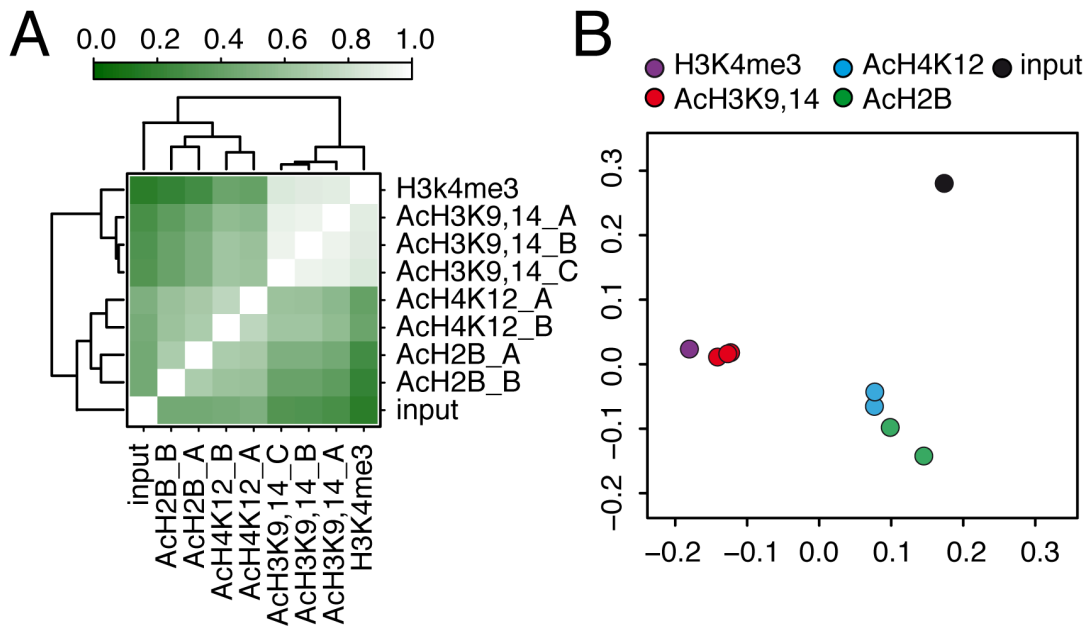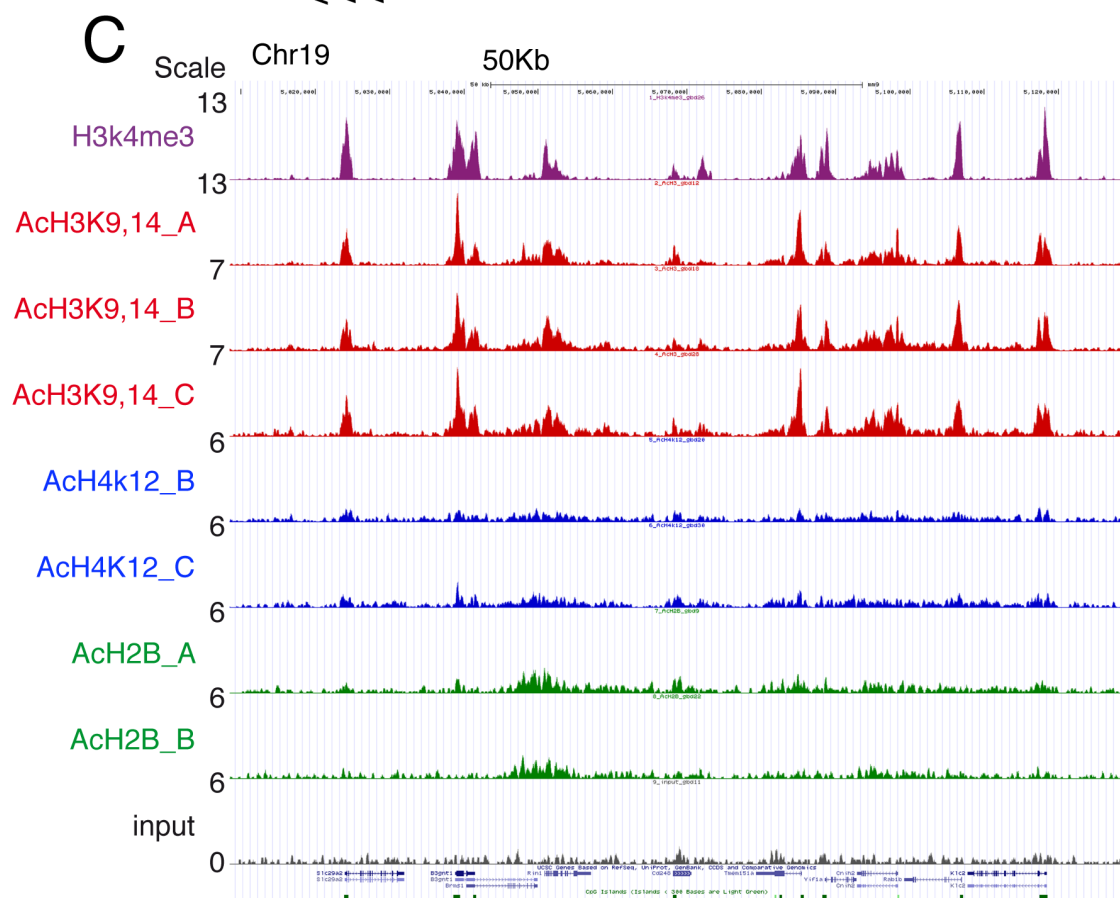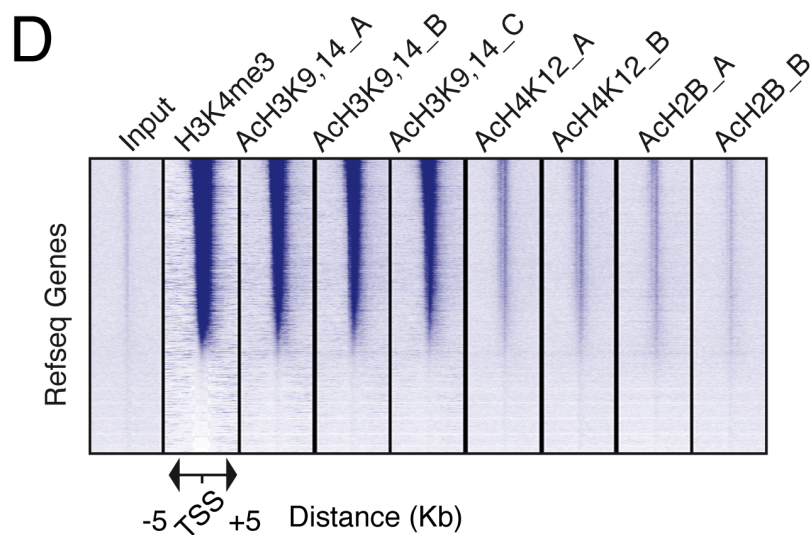

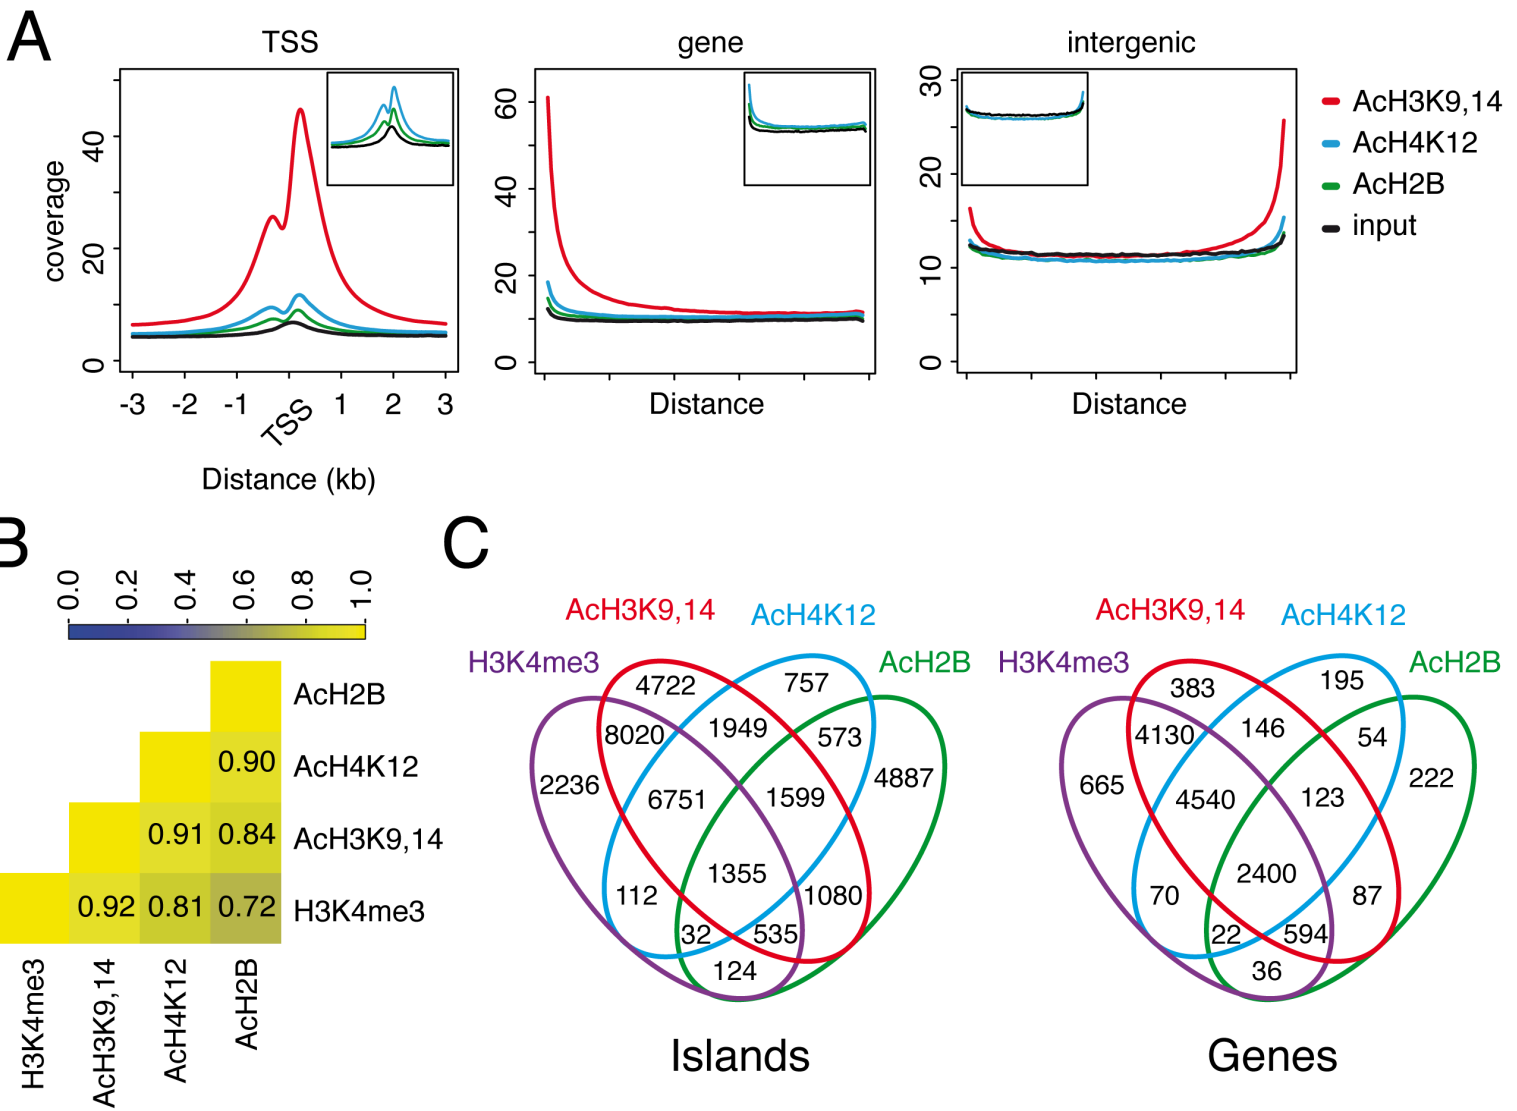

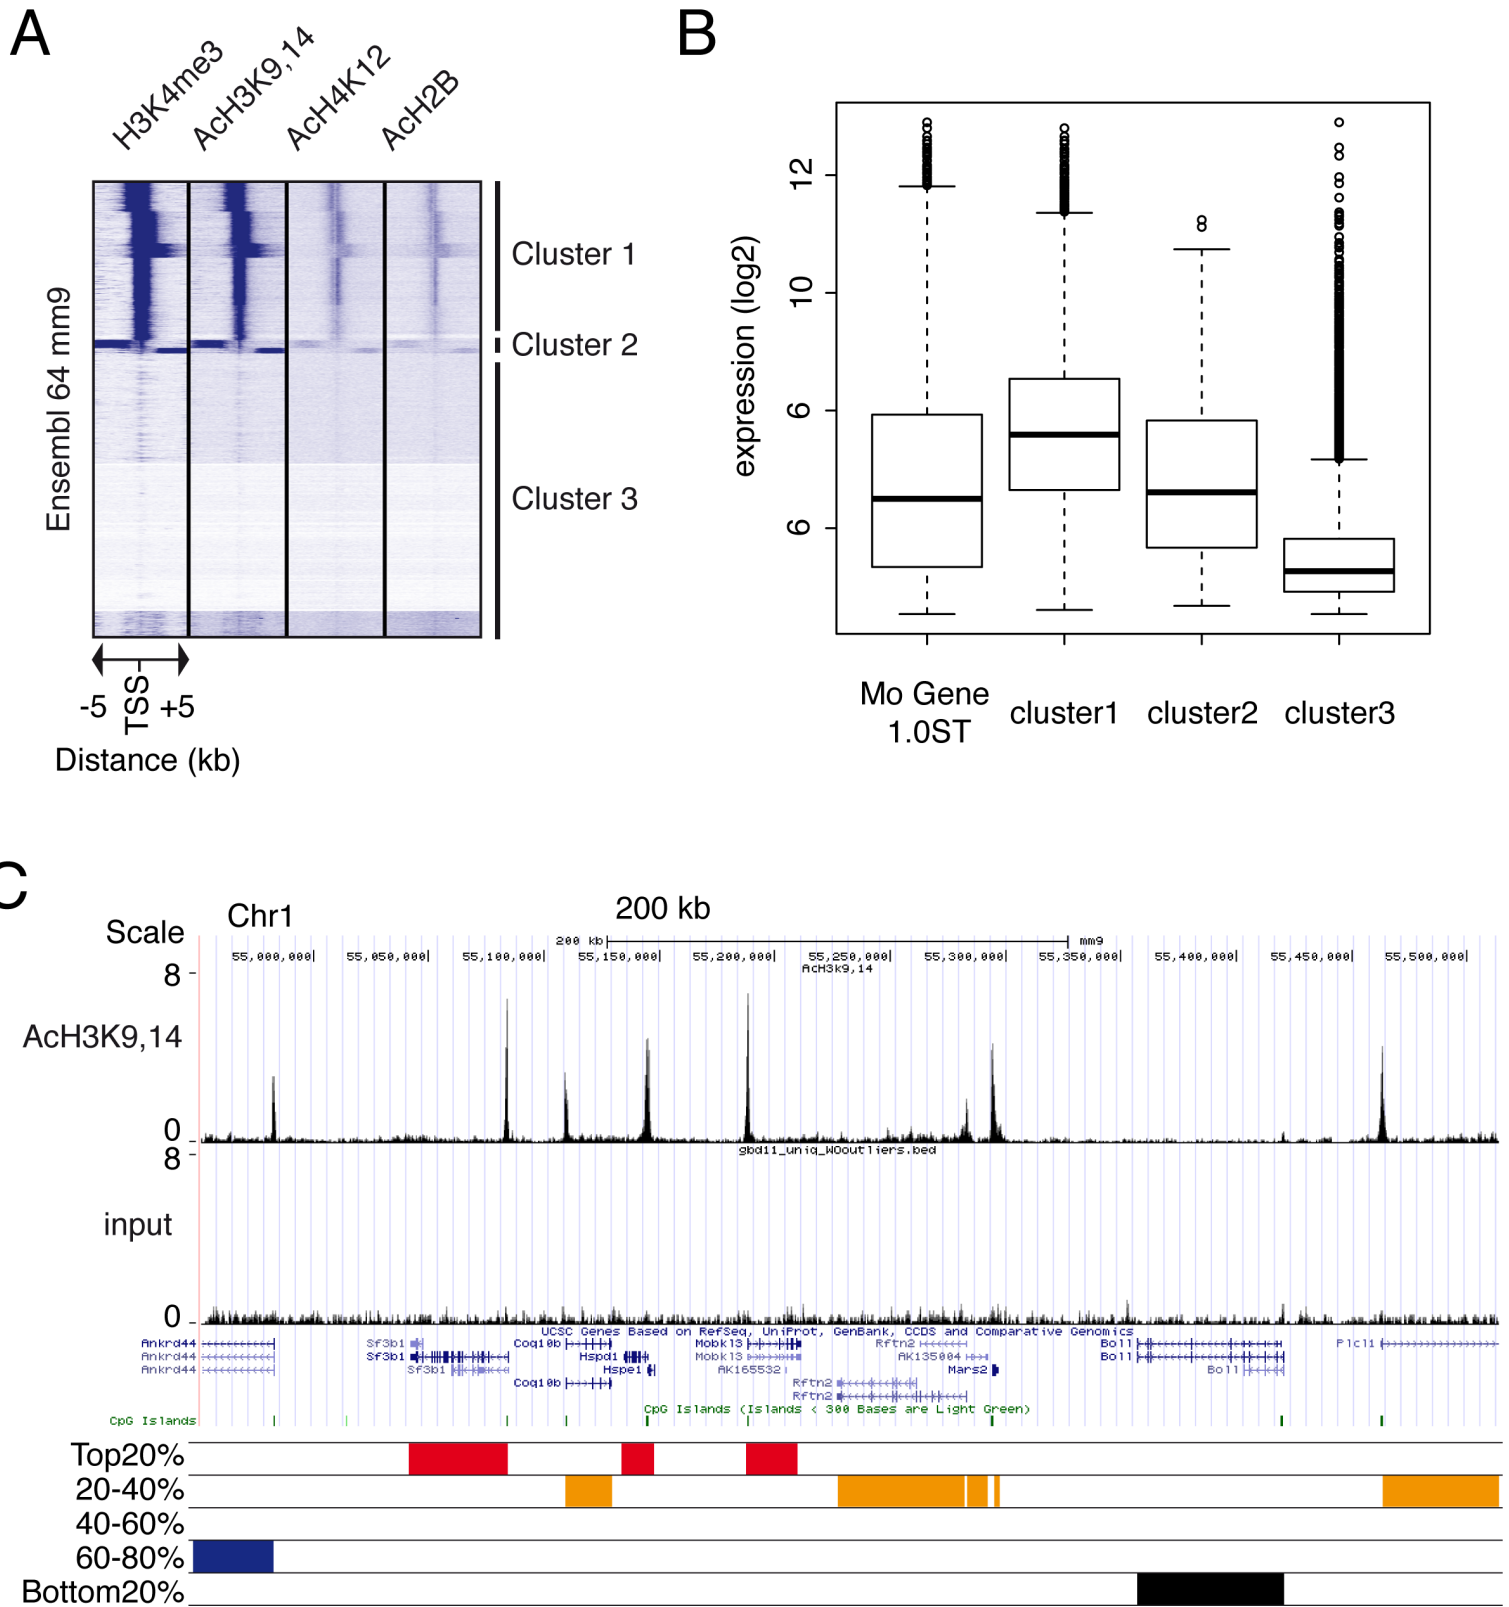

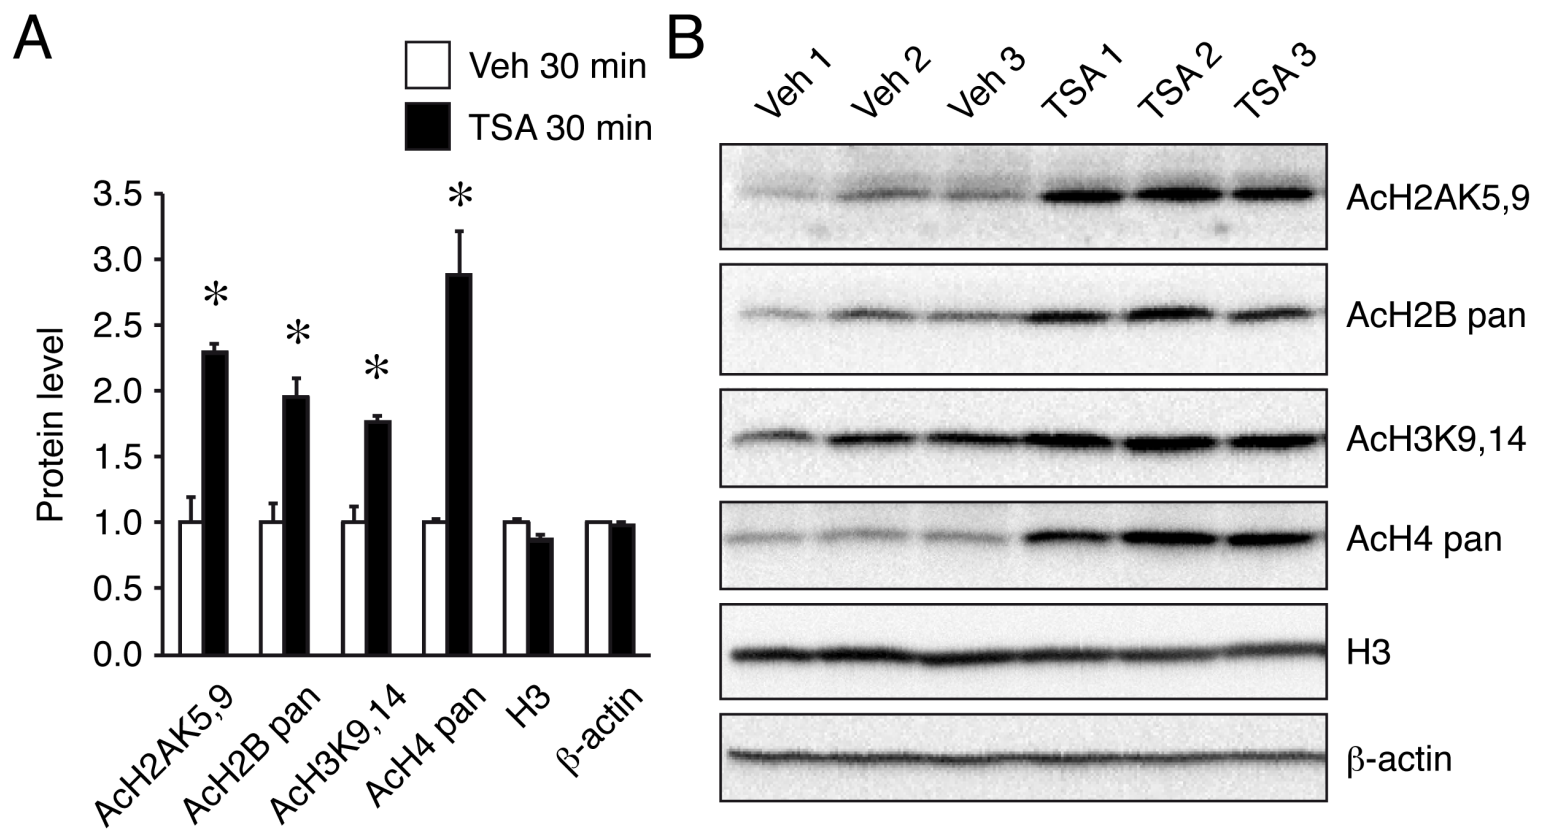

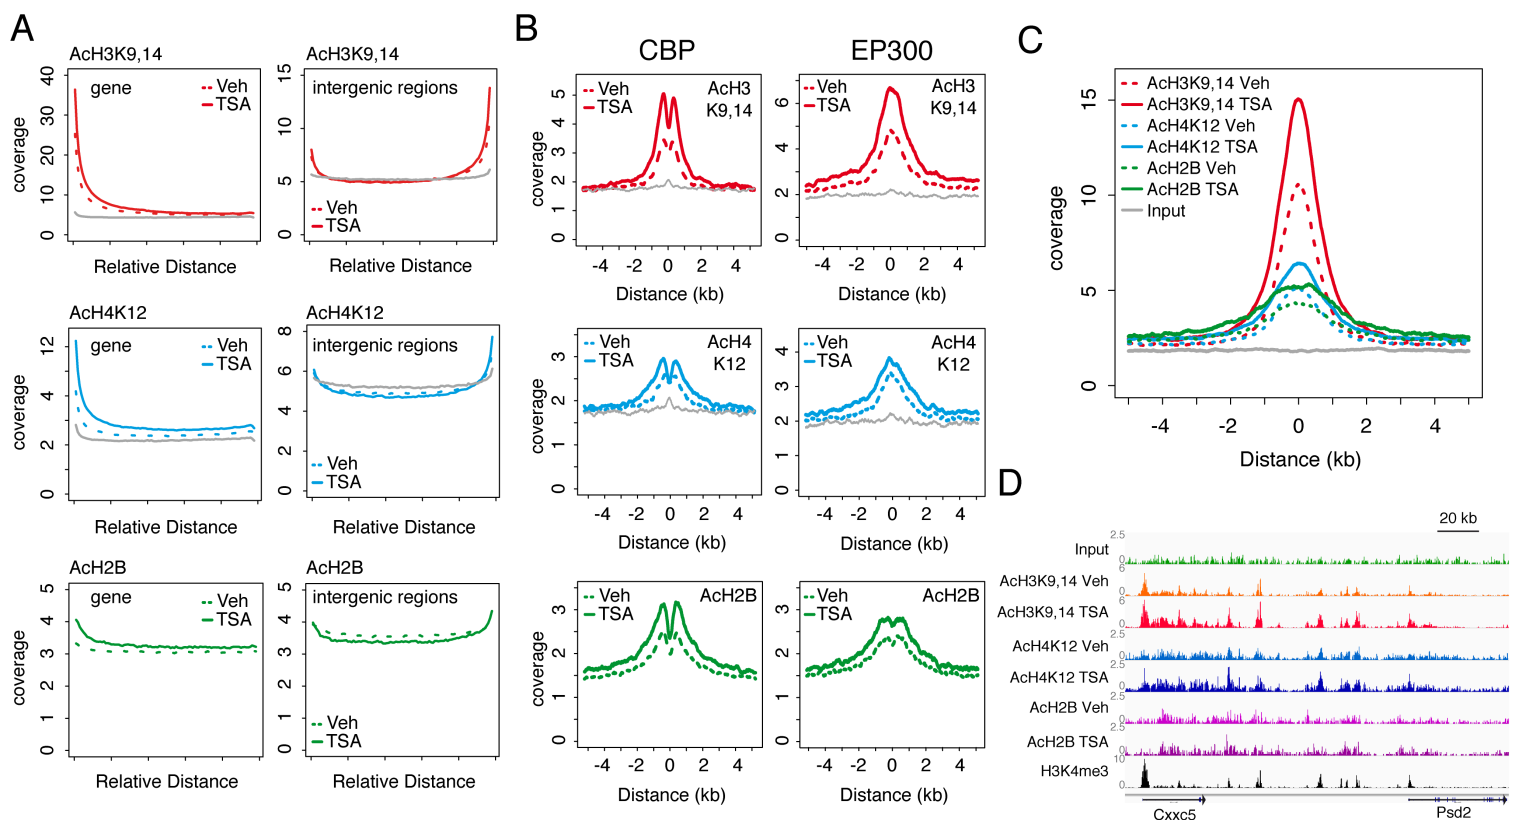

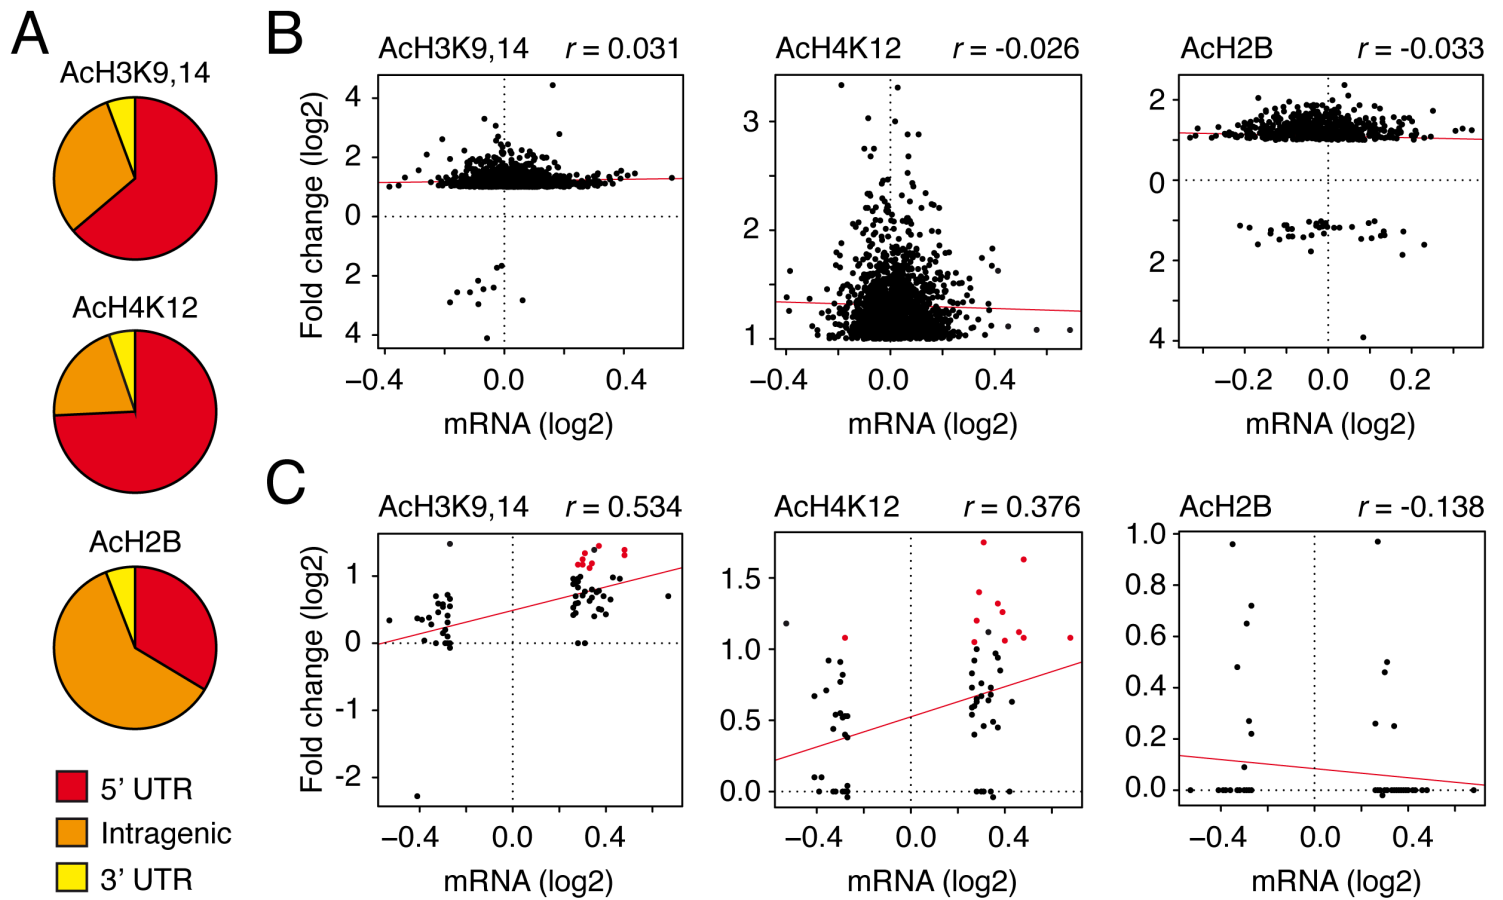

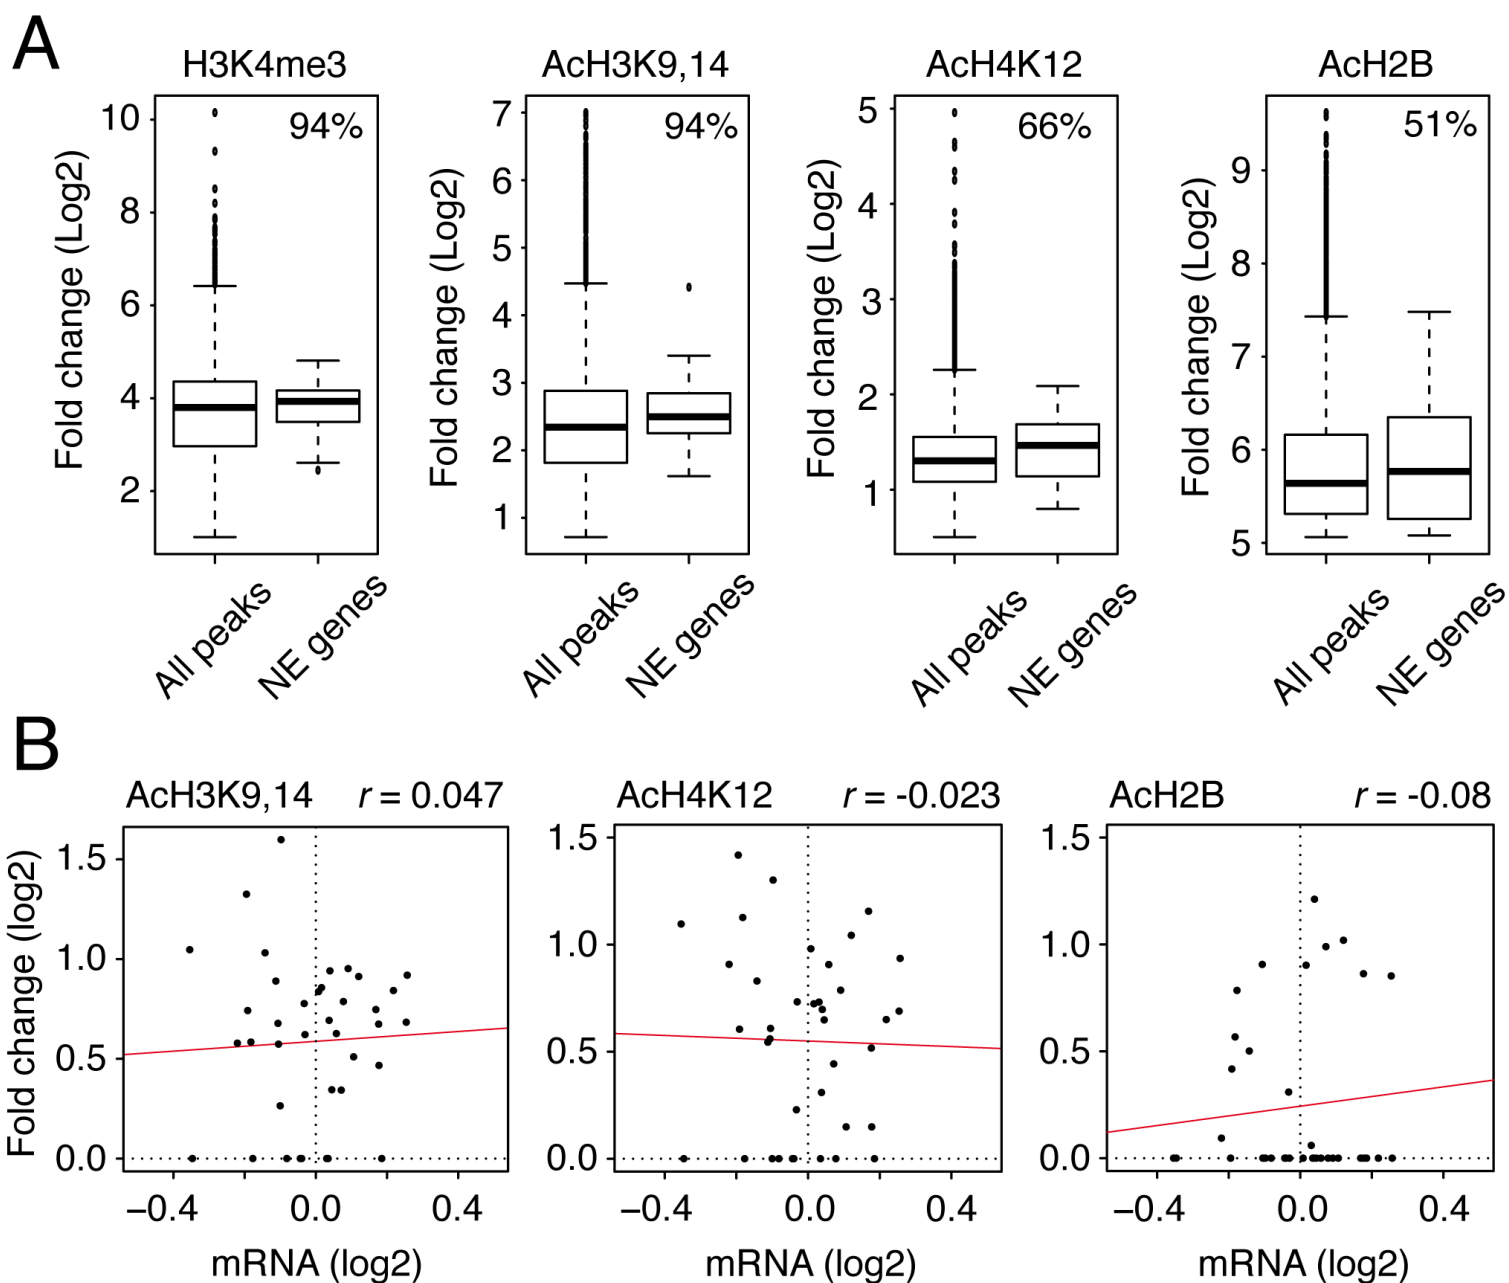

**Supplemental Table S1. ChIPseq library size, technology and other features.**

| Label  | Ab         | Name      | #map     | %unique | N° READS | READ length | Sequencing kit          | Instrument  |
|--------|------------|-----------|----------|---------|----------|-------------|-------------------------|-------------|
| GBD-1  | AcH2B_pan  | Vehicle_1 | 5181299  | 84.0%   | 4353626  | 36          | Scanning buffer v2.0    | GAll        |
| GBD-3  | AcH2B_pan  | Vehicle_2 | 7738581  | 85.4%   | 6612593  | 36          | Chrysalis 36cycles v2.0 | GAll        |
| GBD-5  | AcH2B_pan  | TSA       | 7308482  | 87.0%   | 6356199  | 36          | Chrysalis 36cycles v2.2 | GAll        |
| GBD-9  | AcH2B_pan  | naïve_A   | 9770926  | 88.1%   | 8611330  | 50          | TruSeq™ SBS v5          | Hi-seq 2000 |
| GBD-22 | AcH2B_pan  | naïve_B   | 8658059  | 86.4%   | 7483585  | 50          | TruSeq™ SBS v5          | Hi-seq 2000 |
| GBD-12 | AcH3_K9,14 | naïve_A   | 8237201  | 90.3%   | 7439053  | 50          | TruSeq™ SBS v5          | Hi-seq 2000 |
| GBD-28 | AcH3_K9,14 | naïve_C   | 13867710 | 88.3%   | 12240918 | 50          | TruSeq™ SBS v3          | Hi-seq 2000 |
| GBD-18 | AcH3_K9,14 | Vehicle   | 18156557 | 88.8%   | 16125373 | 50          | TruSeq™ SBS v3          | Hi-seq 2000 |
| GBD-19 | AcH3_K9,14 | TSA       | 17985333 | 90.7%   | 16306398 | 50          | TruSeq™ SBS v3          | Hi-seq 2000 |
| GBD-30 | AcH4_K12   | naïve_A   | 14187515 | 85.6%   | 12142545 | 50          | TruSeq™ SBS v3          | Hi-seq 2000 |
| GBD-20 | AcH4_K12   | Vehicle   | 18009133 | 85.6%   | 15422864 | 50          | TruSeq™ SBS v3          | Hi-seq 2000 |
| GBD-21 | AcH4_K12   | TSA       | 18283124 | 87.4%   | 15984775 | 50          | TruSeq™ SBS v3          | Hi-seq 2000 |
| GBD-26 | H3K4me3    | naïve     | 9536718  | 87.4%   | 8338374  | 50          | TruSeq™ SBS v3          | Hi-seq 2000 |
| GBD-11 | None       | Input_veh | 7904594  | 79.7%   | 6297496  | 50          | TruSeq™ SBS v5          | Hi-seq 2000 |
| GBD-24 | IgG        | naïve     | 9220090  | 79.6%   | 7339222  | 50          | TruSeq™ SBS v3          | Hi-seq 2000 |

| ChIP grade IgG | Type       | Form              | Host   | Reference                                                                                                                                       |
|----------------|------------|-------------------|--------|-------------------------------------------------------------------------------------------------------------------------------------------------|
| H3-K4me3       | Polyclonal | affinity purified | Rabbit | <a href="http://www.millipore.com/catalogue/item/07-473#">http://www.millipore.com/catalogue/item/07-473#</a>                                   |
| Ac-H3 -K9,14   | Polyclonal | purified          | Rabbit | <a href="http://www.millipore.com/catalogue/item/06-599">http://www.millipore.com/catalogue/item/06-599</a>                                     |
| Ac-H4-K12      | Polyclonal | whole antiserum   | Rabbit | <a href="http://www.abcam.com/Histone-H4-acetyl-K12-antibody-ab46983.html">http://www.abcam.com/Histone-H4-acetyl-K12-antibody-ab46983.html</a> |
| AcH2B-pan      | Polyclonal | whole antiserum   | Rabbit | Barco Lab (Immunogen: SKSAPAPKkGskKAITkAQGSC-KLH) k=AcK pos. 5,12,15 and 20                                                                     |



**Supplemental Table S2. Comparison of gene expression profiles in the hippocampus of TSA- and vehicle-treated animals.**

Table shows the differential expression analysis of vehicle versus TSA (2.4mg/kg i.p; 30 min) samples using GeneSpring software (FDR< 0,05 FC>1.2).

| Transcripts | Cluster Id | total_probes        | genesymbol | Fold change | Corrected p-value | p-value                                                     | genedescription |
|-------------|------------|---------------------|------------|-------------|-------------------|-------------------------------------------------------------|-----------------|
| 10510254    | 25         | Fv1                 | 1.61       | 0.0318      | 4.70E-04          | Friend virus susceptibility 1                               |                 |
| 10396270    | 34         | Dact1               | 1.40       | 0.0019      | 2.48E-06          | dapper homolog 1, antagonist of beta-catenin (xenopus)      |                 |
| 10522712    | 25         | Rest                | 1.40       | 0.0162      | 1.14E-04          | RE1-silencing transcription factor                          |                 |
| 10399725    | 27         | Sox11               | 1.38       | 0.0363      | 5.76E-04          | SRY-box containing gene 11                                  |                 |
| 10432236    | 30         | Rnd1                | 1.34       | 0.0189      | 1.47E-04          | Rho family GTPase 1                                         |                 |
| 10493245    | 25         | Mex3a               | 1.34       | 0.0363      | 5.77E-04          | mex3 homolog A (C. elegans)                                 |                 |
| 10592719    | 25         | Oaf                 | 1.32       | 0.0423      | 7.60E-04          | OAF homolog (Drosophila)                                    |                 |
| 10448506    | 40         | Ccnf                | 1.31       | 0.0211      | 1.92E-04          | cyclin F                                                    |                 |
| 10554693    | 28         | Stard5              | 1.30       | 0.0252      | 2.68E-04          | StAR-related lipid transfer (START) domain containing 5     |                 |
| 10368380    | 48         | L3mbtl3             | 1.29       | 0.0171      | 1.28E-04          | l(3)mbt-like 3 (Drosophila)                                 |                 |
| 10534041    | 31         | Stx2                | 1.29       | 0.0033      | 5.92E-06          | syntaxin 2                                                  |                 |
| 10505270    | 26         | Slc31a2             | 1.29       | 0.0459      | 9.42E-04          | solute carrier family 31, member 2                          |                 |
| 10400971    | 27         | Six4                | 1.28       | 0.0039      | 8.45E-06          | sine oculis-related homeobox 4 homolog (Drosophila)         |                 |
| 10464659    | 35         | Rad9                | 1.28       | 0.0129      | 7.15E-05          | RAD9 homolog (S. pombe)                                     |                 |
| 10500011    | 17         | Tuft1               | 1.27       | 0.0469      | 9.86E-04          | tuftelin 1                                                  |                 |
| 10387638    | 35         | Fgf11               | 1.27       | 0.0245      | 2.52E-04          | fibroblast growth factor 11                                 |                 |
| 10550597    | 26         | Fbxo46              | 1.26       | 0.0498      | 1.11E-03          | F-box protein 46                                            |                 |
| 10485170    | 34         | Cry2                | 1.26       | 0.0269      | 3.33E-04          | cryptochrome 2 (photolyase-like)                            |                 |
| 10568228    | 20         | Zfp747              | 1.26       | 0.0268      | 3.27E-04          | zinc finger protein 747                                     |                 |
| 10398751    | 28         | Zfyve21             | 1.25       | 0.0074      | 2.70E-05          | zinc finger, FYVE domain containing 21                      |                 |
| 10549497    | 39         | Fam60a              | 1.24       | 0.0245      | 2.56E-04          | family with sequence similarity 60, member A                |                 |
| 10442454    | 27         | Pgp                 | 1.24       | 0.0431      | 8.04E-04          | phosphoglycolate phosphatase                                |                 |
| 10436442    | 37         | Fam60a              | 1.24       | 0.0018      | 1.88E-06          | family with sequence similarity 60, member A                |                 |
| 10472923    | 26         | Ak3l1               | 1.24       | 0.0019      | 2.65E-06          | adenylate kinase 3-like 1                                   |                 |
| 10382470    | 30         | Tmem104             | 1.24       | 0.0270      | 3.39E-04          | transmembrane protein 104                                   |                 |
| 10599514    | 30         | Bcorl1              | 1.23       | 0.0427      | 7.82E-04          | BCL6 co-repressor-like 1                                    |                 |
| 10435641    | 36         | Fstl1               | 1.23       | 0.0317      | 4.66E-04          | follistatin-like 1                                          |                 |
| 10373515    | 25         | Suox                | 1.23       | 0.0474      | 1.01E-03          | sulfite oxidase                                             |                 |
| 10489958    | 25         | Kcng1               | 1.23       | 0.0457      | 9.24E-04          | potassium voltage-gated channel, subfamily G, member 1      |                 |
| 10416736    | 31         | 6720463M24Rik       | 1.22       | 0.0370      | 6.04E-04          | RIKEN cDNA 6720463M24 gene                                  |                 |
| 10589958    | 14         | Gm9487              | 1.22       | 0.0237      | 2.37E-04          | glyceraldehyde-3-phosphate dehydrogenase pseudogene         |                 |
| 10551496    | 27         | Paf1                | 1.22       | 0.0463      | 9.64E-04          |                                                             |                 |
| 10529028    | 19         | 2310016E02RiklAgbl5 | 1.21       | 0.0033      | 5.70E-06          | RIKEN cDNA 2310016E02 gene l ATP/GTP binding protein-like 5 |                 |
| 10379436    | 32         | Rhbdl3              | 1.21       | 0.0080      | 3.12E-05          | rhomboid, veinlet-like 3 (Drosophila)                       |                 |

|          |    |                             |       |        |                                                                                                                      |
|----------|----|-----------------------------|-------|--------|----------------------------------------------------------------------------------------------------------------------|
| 10545130 | 25 | Gadd45a                     | 1.21  | 0.0498 | 1.12E-03 growth arrest and DNA-damage-inducible 45 alpha                                                             |
| 10445688 | 23 | Ccnd3                       | 1.21  | 0.0457 | 9.30E-04 cyclin D3                                                                                                   |
| 10497237 | 30 | Pag1                        | 1.21  | 0.0252 | 2.78E-04 phosphoprotein associated with glycosphingolipid microdomains 1                                             |
| 10471525 | 31 | Pthr1lStxbp1l11700019L03Rik | 1.21  | 0.0423 | 7.68E-04 peptidyl-tRNA hydrolase 1 homolog (S. cerevisiae)   syntaxin binding protein 1   RIKEN cDNA 1700019L03 gene |
| 10463515 | 25 | Hps6                        | 1.21  | 0.0132 | 7.42E-05 Hermansky-Pudlak syndrome 6                                                                                 |
| 10493309 | 29 | Rit1                        | 1.20  | 0.0040 | 8.98E-06 Ras-like without CAAX 1                                                                                     |
| 10547641 | 38 | Slc2a3                      | 1.20  | 0.0429 | 7.95E-04 solute carrier family 2 (facilitated glucose transporter), member 3                                         |
| 10572419 | 36 | Ell                         | 1.20  | 0.0181 | 1.38E-04 elongation factor RNA polymerase II                                                                         |
| 10366983 | 38 | Tmem194                     | 1.20  | 0.0362 | 5.68E-04 transmembrane protein 194                                                                                   |
| 10489368 | 25 | Fitm2l2310001K24Rik         | 1.20  | 0.0016 | 1.42E-06 fat storage-inducing transmembrane protein 2   RIKEN cDNA 2310001K24 gene                                   |
| 10526838 | 25 | Got2                        | -1.20 | 0.0202 | 1.69E-04 glutamate oxaloacetate transaminase 2, mitochondrial                                                        |
| 10585974 | 25 | Myo9a                       | -1.20 | 0.0041 | 9.70E-06 myosin IXa                                                                                                  |
| 10516211 | 11 | Ndufs5                      | -1.21 | 0.0016 | 1.32E-06 NADH dehydrogenase (ubiquinone) Fe-S protein 5                                                              |
| 10466886 | 25 |                             | -1.21 | 0.0211 | 1.89E-04                                                                                                             |
| 10526311 | 29 | Bcl7b                       | -1.21 | 0.0210 | 1.81E-04 B-cell CLL/lymphoma 7B                                                                                      |
| 10584071 | 46 | Prdm10                      | -1.21 | 0.0084 | 3.52E-05 PR domain containing 10                                                                                     |
| 10589982 | 30 | Azi2                        | -1.21 | 0.0162 | 1.13E-04 5-azacytidine induced gene 2                                                                                |
| 10382104 | 25 | Snord104                    | -1.21 | 0.0135 | 8.01E-05 small nucleolar RNA, C/D box 104                                                                            |
| 10397083 | 27 | Rbm25                       | -1.21 | 0.0263 | 3.06E-04 RNA binding motif protein 25                                                                                |
| 10584350 | 26 | Tpt1lTpt1plGm6790           | -1.21 | 0.0344 | 5.24E-04 tumor protein, translationally-controlled 1   tumor protein, translationally-controlled 1 pseudogene        |
| 10563955 | 24 | Gm3079                      | -1.21 | 0.0449 | 8.54E-04 predicted gene 3079                                                                                         |
| 10469035 | 30 | Sephs1                      | -1.21 | 0.0427 | 7.88E-04 selenophosphate synthetase 1                                                                                |
| 10450752 | 32 | Trim39                      | -1.21 | 0.0139 | 8.65E-05 tripartite motif-containing 39                                                                              |
| 10395628 | 30 | Scfd1                       | -1.22 | 0.0074 | 2.69E-05 Sec1 family domain containing 1                                                                             |
| 10402473 | 32 | Clmn                        | -1.22 | 0.0017 | 1.55E-06 calmin                                                                                                      |
| 10404053 | 13 | Hist1h2bc                   | -1.22 | 0.0252 | 2.78E-04 histone cluster 1, H2bc                                                                                     |
| 10416496 | 42 | Tpt1lTpt1p                  | -1.22 | 0.0224 | 2.12E-04 tumor protein, translationally-controlled 1   tumor protein, translationally-controlled 1 pseudogene        |
| 10563965 | 29 |                             | -1.22 | 0.0252 | 2.72E-04                                                                                                             |
| 10564043 | 29 |                             | -1.22 | 0.0263 | 3.10E-04                                                                                                             |
| 10563967 | 29 |                             | -1.22 | 0.0259 | 2.94E-04                                                                                                             |
| 10563971 | 29 |                             | -1.22 | 0.0259 | 2.96E-04                                                                                                             |
| 10564013 | 27 | Snord115                    | -1.22 | 0.0211 | 1.88E-04 Small nucleolar RNA, C/D Box 115 cluster                                                                    |
| 10564017 | 27 | Snord115                    | -1.22 | 0.0218 | 2.06E-04 Small nucleolar RNA, C/D Box 115 cluster                                                                    |
| 10345620 | 19 | Mrpl30                      | -1.22 | 0.0344 | 5.20E-04 mitochondrial ribosomal protein L30                                                                         |
| 10564033 | 26 |                             | -1.23 | 0.0465 | 9.76E-04                                                                                                             |
| 10564023 | 24 |                             | -1.23 | 0.0370 | 6.02E-04                                                                                                             |
| 10454525 | 33 | lws1                        | -1.23 | 0.0350 | 5.40E-04 IWS1 homolog (S. cerevisiae)                                                                                |
| 10423647 | 31 | Kcns2                       | -1.23 | 0.0218 | 2.05E-04 K+ voltage-gated channel, subfamily S, 2                                                                    |

|          |    |          |       |        |                                                                |
|----------|----|----------|-------|--------|----------------------------------------------------------------|
| 10429491 | 26 | Arc      | -1.23 | 0.0048 | 1.34E-05 activity regulated cytoskeletal-associated protein    |
| 10545515 | 29 | Dnahc6   | -1.25 | 0.0036 | 7.13E-06 dynein, axonemal, heavy chain 6                       |
| 10563907 | 26 |          | -1.25 | 0.0411 | 7.24E-04                                                       |
| 10563905 | 26 |          | -1.25 | 0.0411 | 7.27E-04                                                       |
| 10516867 | 35 | Gmeb1    | -1.25 | 0.0268 | 3.31E-04 glucocorticoid modulatory element binding protein 1   |
| 10557655 | 47 | Srcap    | -1.26 | 0.0265 | 3.16E-04 Snf2-related CREBBP activator protein                 |
| 10402080 | 30 | BC002230 | -1.26 | 0.0462 | 9.58E-04                                                       |
| 10545502 | 30 | Dnahc6   | -1.27 | 0.0457 | 9.07E-04 dynein, axonemal, heavy chain 6                       |
| 10457302 | 39 | Epc1     | -1.27 | 0.0080 | 3.19E-05 enhancer of polycomb homolog 1 (Drosophila)           |
| 10490653 | 27 | Gmeb2    | -1.28 | 0.0039 | 7.98E-06 glucocorticoid modulatory element binding protein 2   |
| 10444957 | 38 | Ppp1r10  | -1.30 | 0.0048 | 1.38E-05 protein phosphatase 1, regulatory subunit 10          |
| 10346914 | 25 | Fastkd2  | -1.31 | 0.0132 | 7.44E-05 FAST kinase domains 2                                 |
| 10459602 | 25 | Ptpn2    | -1.33 | 0.0190 | 1.49E-04 protein tyrosine phosphatase, non-receptor type 2     |
| 10520388 | 25 | Rbm33    | -1.33 | 0.0319 | 4.72E-04 RNA binding motif protein 33                          |
| 10598089 | 25 |          | -1.39 | 0.0414 | 7.36E-04                                                       |
| 10460202 | 36 | Suv420h1 | -1.44 | 0.0356 | 5.54E-04 suppressor of variegation 4-20 homolog 1 (Drosophila) |

**Supplemental Table S3. Comparison of gene expression profiles in the hippocampus of wild-type and cbp<sup>+/-</sup> mice that were treated with TSA- or vehicle and subjected or not to novelty exposure.**

Three-way ANOVA analysis of differential expression in wild-type and cbp<sup>+/-</sup> mice treated with vehicle (VEH) or TSA (2.4mg/kg i.p; 30 min) that were subjected to 1 h novelty exposure (NE) or kept in their home cage (HC). GeneSpring software, FDR<0,05 FC>1.2. Condition variables: cbp<sup>+/-</sup> (CBP) or wild-type (WT); home cage (HC) or novelty exposure (NE); Treatment variables: vehicle (VEH) or TSA.

| TCID     | genesymbol    | FC_CBP-TSA-NE | FC_CBP-TSA-SC | FC_CBP-VEH-NE | FC_CBP-VEH-SC | FC_WT-TSA-NE | FC_WT-TSA-SC | FC_WT-VEH-NE | FC_WT-VEH-SC | FDR (Condition) | FDR (Condition-Genotype) | FDR (Condition-Genotype-Treatment) | FDR (Condition-Treatment) | FDR (Genotype) | FDR (Genotype-Treatment) | FDR (Treatment) |
|----------|---------------|---------------|---------------|---------------|---------------|--------------|--------------|--------------|--------------|-----------------|--------------------------|------------------------------------|---------------------------|----------------|--------------------------|-----------------|
| 10464905 | Npas4         | 2.22          | 0.83          | 2.33          | 0.97          | 2.87         | 0.87         | 2.94         | 1.00         | 1.07E-12        | NS                       | 1.00                               | 1.00                      | 0.24           | 0.99                     | 0.36            |
| 10429491 | Arc           | 1.81          | 0.87          | 2.14          | 1.02          | 2.06         | 0.85         | 2.27         | 1.00         | 9.42E-10        | 1.00                     | 1.00                               | 1.00                      | 0.97           | 0.98                     | 0.12            |
| 10363735 | Egr2          | 2.00          | 1.05          | 2.39          | 0.96          | 2.13         | 0.95         | 2.19         | 1.00         | 1.19E-08        | 1.00                     | 1.00                               | 1.00                      | 1.00           | 0.99                     | 0.93            |
| 10401841 | Dio2          | 1.47          | 0.94          | 1.39          | 0.89          | 1.61         | 0.96         | 1.63         | 1.00         | 6.42E-08        | 1.00                     | 1.00                               | 1.00                      | 0.43           | 0.98                     | 0.99            |
| 10427035 | Nr4a1         | 1.84          | 0.90          | 1.94          | 1.01          | 2.20         | 0.94         | 2.09         | 1.00         | 1.05E-07        | 1.00                     | 1.00                               | 1.00                      | 0.88           | 0.98                     | 0.93            |
| 10504838 | Nr4a3         | 1.45          | 1.12          | 1.52          | 1.00          | 1.36         | 0.98         | 1.33         | 1.00         | 1.05E-07        | 1.00                     | 1.00                               | 1.00                      | 0.27           | 0.98                     | 0.95            |
| 10560481 | Fosb          | 1.83          | 0.99          | 2.02          | 0.93          | 2.15         | 1.07         | 2.03         | 1.00         | 1.05E-07        | 1.00                     | 1.00                               | 1.00                      | 0.83           | 0.98                     | 0.99            |
| 10504218 | Dnajb5        | 1.25          | 1.06          | 1.39          | 1.09          | 1.26         | 1.02         | 1.33         | 1.00         | 1.29E-06        | 1.00                     | 1.00                               | 1.00                      | 0.68           | 0.98                     | 0.41            |
| 10482772 | Nr4a2         | 1.29          | 0.97          | 1.37          | 0.95          | 1.46         | 1.06         | 1.42         | 1.00         | 2.02E-06        | 1.00                     | 1.00                               | 1.00                      | 0.54           | 0.98                     | 0.99            |
| 10397346 | Fos           | 1.73          | 0.82          | 2.02          | 1.01          | 1.94         | 0.90         | 2.18         | 1.00         | 2.15E-06        | 1.00                     | 1.00                               | 1.00                      | 0.96           | 0.98                     | 0.41            |
| 10454782 | Egr1          | 1.67          | 0.92          | 1.67          | 1.03          | 1.73         | 1.04         | 1.81         | 1.00         | 7.00E-06        | 1.00                     | 1.00                               | 1.00                      | 0.96           | 0.99                     | 0.98            |
| 10406626 | Homer1        | 1.41          | 1.05          | 1.49          | 0.99          | 1.30         | 0.92         | 1.33         | 1.00         | 1.36E-05        | 1.00                     | 1.00                               | 1.00                      | 0.64           | 0.98                     | 0.96            |
| 10471586 | Hspa5         | 1.37          | 1.20          | 1.41          | 1.08          | 1.47         | 1.06         | 1.43         | 1.00         | 1.46E-05        | 1.00                     | 1.00                               | 1.00                      | 0.95           | 1.00                     | 0.75            |
| 10458555 | Spry4         | 1.23          | 1.02          | 1.17          | 1.02          | 1.26         | 0.96         | 1.17         | 1.00         | 7.20E-05        | 1.00                     | 1.00                               | 1.00                      | 1.00           | 0.99                     | 0.93            |
| 10449284 | Dusp1         | 1.24          | 0.70          | 1.35          | 0.92          | 1.79         | 0.88         | 2.18         | 1.00         | 1.17E-04        | 1.00                     | 1.00                               | 1.00                      | 0.18           | 0.99                     | 0.36            |
| 10545859 | Egr4          | 1.47          | 0.95          | 1.50          | 0.99          | 1.64         | 1.14         | 1.54         | 1.00         | 1.30E-04        | 1.00                     | 1.00                               | 1.00                      | 0.79           | 0.98                     | 0.96            |
| 10527332 | Nptx2         | 1.19          | 1.04          | 1.32          | 1.02          | 1.43         | 0.98         | 1.31         | 1.00         | 1.54E-04        | 1.00                     | 1.00                               | 1.00                      | 1.00           | 0.98                     | 1.00            |
| 10584578 | Hspa8         | 1.42          | 1.01          | 1.56          | 1.06          | 1.26         | 0.81         | 1.66         | 1.00         | 1.68E-04        | 1.00                     | 1.00                               | 1.00                      | 0.79           | 0.98                     | 0.16            |
| 10395136 |               | 1.37          | 1.09          | 1.37          | 1.05          | 1.36         | 1.08         | 1.48         | 1.00         | 1.78E-04        | 1.00                     | 1.00                               | 1.00                      | 1.00           | 0.99                     | 0.99            |
| 10584576 | Hspa8         | 1.41          | 1.01          | 1.55          | 1.06          | 1.26         | 0.80         | 1.65         | 1.00         | 2.07E-04        | 1.00                     | 1.00                               | 1.00                      | 0.82           | 0.98                     | 0.17            |
| 10584580 |               | 1.37          | 0.83          | 1.68          | 1.04          | 1.35         | 0.79         | 1.63         | 1.00         | 2.74E-04        | 1.00                     | 1.00                               | 1.00                      | 1.00           | 1.00                     | 0.12            |
| 10467206 | Ppp1r3c       | 1.11          | 0.88          | 1.12          | 0.86          | 1.10         | 0.97         | 1.32         | 1.00         | 3.05E-04        | 1.00                     | 1.00                               | 1.00                      | 0.31           | 0.98                     | 0.62            |
| 10401743 | 1933437F05Rii | 1.37          | 1.10          | 1.43          | 1.06          | 1.39         | 1.00         | 1.42         | 1.00         | 4.35E-04        | 1.00                     | 1.00                               | 1.00                      | 0.96           | 0.99                     | 1.00            |
| 10403743 | Inhba         | 1.30          | 0.92          | 1.43          | 0.93          | 1.48         | 1.02         | 1.48         | 1.00         | 4.36E-04        | 1.00                     | 1.00                               | 1.00                      | 0.81           | 0.98                     | 0.99            |
| 10357875 | Btg2          | 1.22          | 0.89          | 1.36          | 0.91          | 1.37         | 0.94         | 1.29         | 1.00         | 4.59E-04        | 1.00                     | 1.00                               | 1.00                      | 0.93           | 0.98                     | 0.94            |
| 10357381 | Ysk4          | 1.10          | 1.06          | 1.24          | 0.90          | 1.23         | 0.97         | 1.35         | 1.00         | 4.59E-04        | 1.00                     | 1.00                               | 1.00                      | 0.73           | 0.98                     | 0.97            |
| 10544150 | Jhdm1d        | 1.35          | 1.19          | 1.31          | 1.00          | 1.21         | 1.04         | 1.36         | 1.00         | 5.02E-04        | 1.00                     | 1.00                               | 1.00                      | 0.78           | 0.98                     | 0.85            |
| 10416251 | Egr3          | 1.22          | 0.91          | 1.23          | 0.91          | 1.30         | 1.08         | 1.39         | 1.00         | 5.25E-04        | 1.00                     | 1.00                               | 1.00                      | 0.39           | 0.99                     | 1.00            |
| 10469425 | Arl5b         | 1.42          | 1.16          | 1.30          | 0.99          | 1.54         | 1.15         | 1.47         | 1.00         | 9.28E-04        | 1.00                     | 1.00                               | 1.00                      | 0.90           | 0.99                     | 0.29            |
| 10378545 |               | 1.34          | 0.75          | 1.29          | 0.97          | 1.27         | 0.88         | 1.24         | 1.00         | 9.28E-04        | 1.00                     | 1.00                               | 1.00                      | 1.00           | 0.98                     | 0.68            |
| 10544148 | Jhdm1d        | 1.19          | 1.04          | 1.20          | 0.96          | 1.20         | 0.97         | 1.13         | 1.00         | 9.28E-04        | 1.00                     | 1.00                               | 1.00                      | 0.97           | 0.99                     | 0.89            |
| 10346878 | Zdbf2         | 1.42          | 1.08          | 1.29          | 0.92          | 1.37         | 1.03         | 1.32         | 1.00         | 9.97E-04        | 1.00                     | 1.00                               | 1.00                      | 1.00           | 0.98                     | 0.54            |
| 10449741 | Snf1lk        | 1.28          | 1.06          | 1.34          | 0.99          | 1.60         | 1.09         | 1.64         | 1.00         | 1.46E-03        | 1.00                     | 1.00                               | 1.00                      | 0.61           | 0.99                     | 0.99            |
| 10593492 | Zc3h12c       | 1.22          | 0.98          | 1.41          | 1.08          | 1.22         | 0.99         | 1.26         | 1.00         | 1.56E-03        | 1.00                     | 1.00                               | 1.00                      | 0.88           | 0.98                     | 0.49            |
| 10573198 | Dnajb1        | 1.44          | 1.09          | 1.42          | 1.04          | 1.48         | 1.15         | 1.51         | 1.00         | 2.33E-03        | 1.00                     | 1.00                               | 1.00                      | 1.00           | 0.99                     | 0.91            |

|          |          |      |      |      |      |      |      |      |      |          |      |      |      |      |      |      |
|----------|----------|------|------|------|------|------|------|------|------|----------|------|------|------|------|------|------|
| 10448471 | Dnase1l2 | 1.22 | 1.06 | 1.18 | 1.02 | 1.16 | 0.99 | 1.24 | 1.00 | 5.54E-03 | 1.00 | 1.00 | 1.00 | 0.99 | 0.98 | 1.00 |
| 10366043 | Dusp6    | 1.27 | 0.91 | 1.32 | 0.96 | 1.27 | 1.01 | 1.36 | 1.00 | 5.83E-03 | 1.00 | 1.00 | 1.00 | 0.97 | 0.99 | 0.96 |
| 10492428 | Tiparp   | 1.24 | 1.08 | 1.26 | 0.92 | 1.21 | 1.03 | 1.38 | 1.00 | 6.54E-03 | 1.00 | 1.00 | 1.00 | 1.00 | 0.98 | 0.99 |
| 10510574 | Errf1    | 1.14 | 0.96 | 1.14 | 0.92 | 1.26 | 0.96 | 1.37 | 1.00 | 7.03E-03 | 1.00 | 1.00 | 1.00 | 0.62 | 0.98 | 0.98 |
| 10364950 | Gadd45b  | 1.44 | 1.13 | 1.62 | 0.96 | 1.63 | 1.31 | 1.72 | 1.00 | 8.26E-03 | 1.00 | 1.00 | 1.00 | 0.87 | 0.98 | 0.90 |
| 10502655 | Cyr61    | 1.35 | 0.77 | 1.11 | 0.84 | 1.56 | 0.78 | 1.65 | 1.00 | 9.60E-03 | 1.00 | 1.00 | 1.00 | 0.67 | 0.98 | 0.98 |
| 10417034 | Dnajc3a  | 1.20 | 1.07 | 1.17 | 1.01 | 1.17 | 1.02 | 1.14 | 1.00 | 1.03E-02 | 1.00 | 1.00 | 1.00 | 0.91 | 0.98 | 0.79 |
| 10417013 | Dnajc3a  | 1.20 | 1.07 | 1.17 | 1.01 | 1.17 | 1.01 | 1.14 | 1.00 | 1.03E-02 | 1.00 | 1.00 | 1.00 | 0.91 | 0.98 | 0.80 |
| 10440522 | Adamts1  | 1.01 | 0.91 | 1.04 | 0.89 | 1.12 | 1.02 | 1.29 | 1.00 | 1.03E-02 | 1.00 | 1.00 | 1.00 | 0.04 | 0.98 | 0.82 |
| 10404595 | Ppp1r3g  | 1.13 | 0.94 | 1.13 | 0.94 | 1.16 | 0.98 | 1.27 | 1.00 | 1.03E-02 | 1.00 | 1.00 | 1.00 | 0.76 | 0.98 | 0.94 |
| 10412038 | Zswim6   | 1.24 | 1.10 | 1.15 | 0.90 | 1.29 | 1.11 | 1.09 | 1.00 | 1.11E-02 | 1.00 | 1.00 | 1.00 | 0.98 | 1.00 | 0.01 |
| 10394735 | Pdia6    | 1.19 | 1.08 | 1.15 | 1.02 | 1.22 | 1.03 | 1.15 | 1.00 | 1.14E-02 | 1.00 | 1.00 | 1.00 | 1.00 | 1.00 | 0.47 |
| 10576971 | Irs2     | 1.12 | 0.90 | 1.18 | 0.94 | 1.14 | 0.99 | 1.21 | 1.00 | 1.21E-02 | 1.00 | 1.00 | 1.00 | 0.83 | 0.99 | 0.84 |
| 10580282 | Junb     | 1.35 | 1.04 | 1.35 | 1.03 | 1.36 | 1.12 | 1.37 | 1.00 | 1.34E-02 | 1.00 | 1.00 | 1.00 | 1.00 | 0.98 | 0.97 |
| 10545682 | Tet3     | 1.20 | 1.00 | 1.16 | 0.96 | 1.33 | 1.10 | 1.16 | 1.00 | 1.34E-02 | 1.00 | 1.00 | 1.00 | 0.73 | 0.98 | 0.36 |
| 10571312 | Dusp4    | 1.09 | 0.91 | 1.17 | 0.99 | 1.09 | 0.94 | 1.28 | 1.00 | 1.58E-02 | 1.00 | 1.00 | 1.00 | 0.97 | 0.98 | 0.24 |
| 10573626 | Gpt2     | 1.03 | 1.00 | 1.09 | 0.93 | 1.22 | 1.03 | 1.20 | 1.00 | 1.63E-02 | 1.00 | 1.00 | 1.00 | 0.26 | 0.99 | 0.97 |
| 10516064 | Mfsd2    | 1.18 | 0.93 | 1.19 | 0.95 | 1.36 | 1.02 | 1.36 | 1.00 | 1.83E-02 | 1.00 | 1.00 | 1.00 | 0.66 | 0.99 | 1.00 |
| 10371400 | Cry1     | 1.24 | 1.13 | 1.07 | 1.00 | 1.29 | 1.08 | 1.16 | 1.00 | 2.19E-02 | 1.00 | 1.00 | 1.00 | 1.00 | 0.98 | 0.02 |
| 10363350 | P4ha1    | 1.15 | 1.10 | 1.28 | 0.96 | 1.26 | 1.04 | 1.27 | 1.00 | 2.29E-02 | 1.00 | 1.00 | 1.00 | 1.00 | 1.00 | 0.98 |
| 10543785 | AB041803 | 1.11 | 0.99 | 1.40 | 1.09 | 1.37 | 0.98 | 1.47 | 1.00 | 2.71E-02 | 1.00 | 1.00 | 1.00 | 1.00 | 0.98 | 0.49 |
| 10543017 | Pdk4     | 1.23 | 1.07 | 1.27 | 0.99 | 1.32 | 1.14 | 1.46 | 1.00 | 2.74E-02 | 1.00 | 1.00 | 1.00 | 0.82 | 0.99 | 0.99 |
| 10593430 | Snf1lk2  | 1.28 | 1.10 | 1.17 | 0.94 | 1.33 | 1.05 | 1.19 | 1.00 | 2.95E-02 | 1.00 | 1.00 | 1.00 | 1.00 | 0.98 | 0.27 |
| 10364702 | Midn     | 1.24 | 1.10 | 1.11 | 0.90 | 1.42 | 1.09 | 1.18 | 1.00 | 3.06E-02 | 1.00 | 1.00 | 1.00 | 0.72 | 0.99 | 0.07 |
| 10530910 | Uba6     | 1.33 | 1.19 | 1.22 | 1.06 | 1.27 | 1.00 | 1.15 | 1.00 | 3.16E-02 | 1.00 | 1.00 | 1.00 | 0.51 | 0.98 | 0.37 |
| 10572800 | Klf2     | 1.26 | 1.00 | 1.16 | 1.01 | 1.32 | 1.03 | 1.32 | 1.00 | 3.31E-02 | 1.00 | 1.00 | 1.00 | 0.94 | 0.99 | 0.98 |
| 10520862 | Fosl2    | 1.19 | 1.05 | 1.20 | 1.03 | 1.32 | 1.13 | 1.28 | 1.00 | 3.80E-02 | 1.00 | 1.00 | 1.00 | 0.84 | 0.98 | 0.86 |
| 10426098 | Creld2   | 1.42 | 1.17 | 1.15 | 0.98 | 1.25 | 1.12 | 1.17 | 1.00 | 3.98E-02 | 1.00 | 1.00 | 1.00 | 0.95 | 0.98 | 0.03 |
| 10400095 | Ifrd1    | 1.17 | 1.04 | 1.22 | 0.98 | 1.16 | 0.98 | 1.33 | 1.00 | 3.98E-02 | 1.00 | 1.00 | 1.00 | 1.00 | 0.98 | 0.91 |
| 10344807 | Cspp1    | 1.18 | 1.11 | 1.33 | 1.11 | 1.40 | 1.07 | 1.17 | 1.00 | 4.41E-02 | 1.00 | 1.00 | 1.00 | 1.00 | 0.98 | 0.93 |
| 10451650 | NfyA     | 1.17 | 1.07 | 1.25 | 1.11 | 1.18 | 1.04 | 1.28 | 1.00 | 4.71E-02 | 1.00 | 1.00 | 1.00 | 0.99 | 0.99 | 0.83 |
| 10488048 | Mkks     | 1.07 | 0.94 | 1.11 | 1.02 | 1.10 | 1.00 | 1.20 | 1.00 | 4.80E-02 | 1.00 | 1.00 | 1.00 | 0.84 | 0.99 | 0.51 |

**Supplemental Materials and Methods:***Animals and treatments*

Experiments were performed in adult (3-5 months) C57/DBA F1 hybrid females. Trichostatin A (TSA) (Sigma Aldrich Química S.A.) 2,4 mg/kg in DMSO/Saline solution (1:4) was administered by intraperitoneal injection. We performed a series of preliminary experiments with different doses of TSA (0.6-2.4 mg/kg) as well as with a second HDACi – sodium butyrate (NaBt) (0.15-1.2 g/kg). Although, both drugs produced a pronounced increase of histone acetylation levels in protein extracts, we chose TSA over NaBt because the later severely reduced the activity of the animal in the open arena when used at high doses (data not shown). We chose the higher concentration of TSA (2.4 mg/Kg) because we wanted to have a histone hyperacetylation response as robust as possible without affecting locomotor activity. The generation (55) and neurological characterization (3,20) of *cbp*<sup>+/-</sup> mice have been previously described. These mice are maintained in a DBA and C57BL/6J mixed background because they are not viable in a pure C57BL/6J background (3). All mice were housed in 30x15x11 cm clear cages occupied by 4-5 mice and kept on a 12h light/dark cycle; food and water were provided *ad libitum*. The Exposure to novelty consisted of placing an individual animal in a white Plexiglas square box (50×50×30 cm) containing plastic tubing and small toys for 1 h. In the novelty experiment, TSA or vehicle solutions were administrated 15 min before starting the novelty paradigm. Homecage animals were maintained in their cages but otherwise were treated as the novelty groups. Mice were sacrificed immediately after novelty and the hippocampi dissected and treated according to the use given to these animals (see Western blot, ChIP and RT-qPCR sections). Experimental protocols were compliant with European regulations and approved by the Institutional Animal Care and Use Committee.

*Western blot analyses*

Western blot analyses were carried out as previously described (21,56). The following antibodies were used: acetyl-histone antibodies specific for the panacetylated forms of H2A (K5, K9), H2B (K5, K12, K15, K20), H3 (K9, K14) and H4 (K5, K8, K12, K16) produced in our laboratory (21);  $\alpha$ -AcH3K9,14 (06-599),  $\alpha$ -H2B (07-371),  $\alpha$ -H3 (05-499) from Millipore (Billerica, MA, USA);  $\alpha$ -AcH4K12 (ab46983) from Abcam (Cambridge, UK);  $\alpha$ - $\beta$ -actin (F5441) and HRP-conjugated secondary antibodies from Sigma Aldrich Química S.A.

*RT-qPCR and microarray analyses*

Total hippocampal RNA was purified using TRI reagent (Sigma) and reverse-transcribed using RevertAid First Strand cDNA Synthesis kit (Fermentas, St. Leon-Rot, Germany) according to manufacturers' instructions. Quantitative RT-PCRs (qRT-PCR) assays to validate microarray data were performed in an Applied Biosystems 7300 real-time PCR unit using SYBR GreenER mix (Invitrogen). Each independent sample was assayed in duplicate and normalized using glyceraldehyde 3-phosphate dehydrogenase (GAPDH) levels. All primer sequences are available upon request. For microarray hybridization, total RNA extracted from the hippocampus of 3-4 age, sex and genotype-matched mice were pooled, treated with DNaseI and cleaned up using the RNeasy mini kit (Qiagen, Valencia, CA). Three to five independent pooled samples per genotype, condition and treatment, were hybridized to Mouse Gene 1.0 ST expression arrays (Affymetrix, Santa Clara, CA). The arrays were hybridized, washed and screened for quality according to the manufacturer's protocol. The microarray data were then analysed using GeneSpring GX 11 (Agilent Technologies, Inc., Santa Clara, CA). RMA (Robust Multichip Average) algorithm was used for data normalization. Principal component analysis revealed clustering of

samples according to the batch of replicates; therefore, normalization was conducted using the median of the corresponding control samples values as reference. TCs were then filtered on signal intensity by establishing a lower cutoff at the 20th percentile (20th–100th percentile). Transcripts differentially regulated upon TSA treatment in wild-type mice were identified using unpaired t-test. Novelty-regulated transcripts were identified by three-way ANOVA analysis. In significance analysis, P-values were obtained by asymptotic computation and corrected for multiple testing with Benjamini–Hochberg FDR method. Hierarchical clustering was performed using either GeneSpring software or R 2.15 (<http://www.r-project.org/>). The following filters were applied: fold change (FC) > 1.2 and adjusted P-value < 0.05. GO enrichment analysis for differentially regulated genes upon TSA was performed using the web-based gene set analysis toolkit (WebGestalt) (57).

#### *ChIP assays and ChIPseq analysis*

Chromatin immunoprecipitation (ChIP) was performed as described previously (20). Diluted chromatin was incubated overnight at 4°C in the presence of specific IgGs against AcH3 (Millipore, 06-599), AcH4K12 (abcam, ab46983), AcH2B (21) or H3K4me3 (Millipore, 07-473) or rabbit-derived pre-immune serum. All these antibodies are residue/s specific and suitable for ChIP assays and ChIP-seq experiments. In particular, anti-AcH4K12 has been validated in previous ChIPseq experiments in the hippocampus (23), and the anti-AcH3 and anti-H3K4me3 are included in the ENCODE project antibody database (<http://genome.ucsc.edu/ENCODE/antibodies.html>). The AcH3 antibody was produced by immunization with a KLH-conjugated peptide corresponding to amino acids 1-20 of Tetrahymena histone H3 (ARTKQTAR[K\*]STGG[K\*]APRKQLC) and it is referred to as AcH3K9,14 through the text. The AcH2B antiserum was produced



by our group through repeated subcutaneous injection in rabbits of a KLH-conjugated peptide with residues 1-22 of mouse histone H2B acetylated at the lysine residues in positions 5, 12, 15 and 20. The antiserum has been used in a number of previous studies (20,21,28) and its performance was compared with that of commercial antibodies with the same specificity. In addition, the specificity of the AcH2B antiserum was evaluated by competition assays in the presence of the acetylated or unacetylated form of the peptide used in the production of the antibody (Supplemental Figure S2A). Immunoprecipitation and CHIP experiments show that the rabbit anti-AcH2B antiserum precipitates AcH2B (Figure S2B) and associated DNA (Figure S2C). CHIP-qPCR was performed as described for RT-qPCR using specific primers immediately upstream of the transcription start site (TSS). All primer sequences are available upon request. For CHIPseq, whole hippocampi from 3 mice were pooled in each sample to perform CHIP. High-throughput sequencing of DNA libraries from AcH2B CHIP, vehicle and TSA, was performed using a GAII (Illumina). All the other sample libraries, including 2 additional AcH2B datasets (n=2), AcH3K9,14 (naïve (n=2), vehicle and TSA), AcH4K12 (naïve, vehicle, TSA), H3K4me3, input and IgG were sequenced in HiSeq-2000 apparatus (Illumina). See Table S1 for additional information on library size, preparation and other details. We followed ENCODE recommendations for CHIPseq experiments (58). Reads were aligned to the NCBI-M37/mm9 reference genome using BWA (59) and BAM files were parsed using SAMTOOLS to select uniquely mapped reads (60). Cross-correlation matrix and dendrogram of HiSeq-2000 datasets were generated by using coverage values per kb (counts per million per kb) across the whole genome with Seqmonk ([Simon Andrews, Babraham Institute](#)). In addition, two dimension Multi-Dimensional Scaling (MDS) of whole coverage profiles was performed using htSeqTools (61). To extract acetylation-

enriched chromatin regions, paired analysis of datasets from vehicle and TSA-treated mice were performed by using the SICER algorithm (22). To reduce background noise, input and IgG were pooled together to conform the control library used in the peak calling process. SICER parameters for island identification and differential analysis were as follows: redundancy threshold = 100, window size = 200, gap size = 2 (AcH3K9,K14) or 3 (AcH4K12), fragment size = 150, effective genome fraction = 0.77 and FDR =  $10^{-8}$  (AcH3K9,K14 and AcH4K12) or E value = 10 (AcH2B). Two independent biological replicates were merged to generate the AcH2B vehicle dataset used in the differential analysis. Identification of H3K4me3 chromatin-enriched regions was performed with the same settings as AcH3K9,14. Island width analysis was done using the same parameters for all the datasets ( $w=2$ ,  $g=3$ ). Overlap and annotation of significantly enriched islands was done with ChipPeakAnno (62). Integrative Genomics Viewer (IGV) (63) were used for data visualization and coverage snapshots at discrete loci. For genome-wide feature analysis, regions of interest were extracted and centered. CBP- and p300-bound sites were obtained from (26,27); graphs show the mean density plotted normalized relative to total number of sequence reads in the corresponding datasets. Density heatmap density plots for the indicated histone modification were determined as counts per million in 25bp bins in the 10 kb region surrounding the TSS. seqMINER (64) was used to generate the heatmaps and k-means clustering data.

### *Statistical analysis*

Quantitative data were analyzed using R 2.15 and SPSS Statistic software V.19 (IBM, Armonk, NY). The data were first subjected to a normality test and an equal variance test. Data that passed these two tests were then analyzed by either ANOVA when comparing several groups or Student's t-test to compare two groups. Cumulative

probability distribution histograms were compared using Kolmogorov-Smirnov test. Sample size is indicated in the description of each experiment and figure legends.

#### *Data access*

The files generated in the microarrays and ChIPseq screens are available at the Gene Expression Omnibus (GEO) database with the accession number GSE44868.

#### **References**

55. Tanaka, Y., Naruse, I., Maekawa, T., Masuya, H., Shiroishi, T. and Ishii, S. (1997) Abnormal skeletal patterning in embryos lacking a single Cbp allele: a partial similarity with Rubinstein-Taybi syndrome. *Proc Natl Acad Sci U S A*, **94**, 10215-10220.
56. Lopez de Armentia, M., Jancic, D., Olivares, R., Alarcon, J.M., Kandel, E.R. and Barco, A. (2007) cAMP response element-binding protein-mediated gene expression increases the intrinsic excitability of CA1 pyramidal neurons. *J Neurosci*, **27**, 13909-13918.
57. Zhang, B., Kirov, S. and Snoddy, J. (2005) WebGestalt: an integrated system for exploring gene sets in various biological contexts. *Nucleic Acids Res*, **33**, W741-748.
58. Landt, S.G., Marinov, G.K., Kundaje, A., Kheradpour, P., Pauli, F., Batzoglou, S., Bernstein, B.E., Bickel, P., Brown, J.B., Cayting, P. *et al.* (2012) ChIP-seq guidelines and practices of the ENCODE and modENCODE consortia. *Genome Res*, **22**, 1813-1831.
59. Li, H. and Durbin, R. (2010) Fast and accurate long-read alignment with Burrows-Wheeler transform. *Bioinformatics*, **26**, 589-595.
60. Li, H., Handsaker, B., Wysoker, A., Fennell, T., Ruan, J., Homer, N., Marth, G., Abecasis, G. and Durbin, R. (2009) The Sequence Alignment/Map format and SAMtools. *Bioinformatics*, **25**, 2078-2079.
61. Planet, E., Attolini, C.S., Reina, O., Flores, O. and Rossell, D. (2012) htSeqTools: high-throughput sequencing quality control, processing and visualization in R. *Bioinformatics*, **28**, 589-590.
62. Zhu, L.J., Gazin, C., Lawson, N.D., Pages, H., Lin, S.M., Lapointe, D.S. and Green, M.R. (2010) ChIPpeakAnno: a Bioconductor package to annotate ChIP-seq and ChIP-chip data. *BMC Bioinformatics*, **11**, 237.
63. Robinson, J.T., Thorvaldsdottir, H., Winckler, W., Guttman, M., Lander, E.S., Getz, G. and Mesirov, J.P. (2011) Integrative genomics viewer. *Nature biotechnology*, **29**, 24-26.
64. Ye, T., Krebs, A.R., Choukrallah, M.A., Keime, C., Plewniak, F., Davidson, I. and Tora, L. (2011) seqMINER: an integrated ChIP-seq data interpretation platform. *Nucleic Acids Res*, **39**, e35.
